# Supplementary material
Source: Springer Nature journal article supplement (https://www.springermedizin.de/resource/supplementary/12875_2014_1089_MOESM3_ESM.docx/9435806)
Supplement: MOESM3 [file 9435806]

| **Table 2.** Age and gender distribution of patients with chronic diseases and of the total population | | | | | | | | | | | | | | | | | |
| --- | --- | --- | --- | --- | --- | --- | --- | --- | --- | --- | --- | --- | --- | --- | --- | --- | --- |
|  | | **Patients with one chronic disease** | | | | | | | | | | **Patients with two or more chronic diseases** | | **All patients with chronic diseases** | | **Total population** | |
|  | | **Heart disease** | | **Lung disease** | | **Diabetes** | | **Psychiatric disease** | | **Cancer** | |  | |  | |  | |
| **Gender**  (n (%)) | |  | | | | | | | | | |  | |  |  |  |  |
| Male | | 134 | (58.0) | 500 | (43.9) | 512 | (53.6) | 125 | (49.2) | 374 | (36.8) | 582 | (45.2) | 2,227 | (45.3) | 6,334 | (45.5) |
| Female | | 97 | (42.0) | 639 | (56.1) | 443 | (46.4) | 129 | (50.8) | 671 | (64.2) | 706 | (54.8) | 2,685 | (54.7) | 7,596 | (54.5) |
| All | | 231 | (100.0) | 1,139 | (100.0) | 955 | (100.0) | 254 | (100.0) | 1,045 | (100.0) | 1,288 | (100.0) | 4,912 | (100.0) | 13,930 | (100.0) |
| **Age groups in years**  (n (%)) |  | | | | | | | | | | |  | |  |  |  |  |
| 18-40 | | 7 | (3.0) | 273 | (24.0) | 125 | (13.1) | 129 | (50.7) | 183 | (17.5) | 59 | (4.6) | 776 | (15.8) | 5,331 | (38.3) |
| 41-60 | | 51 | (22.1) | 315 | (27.7) | 264 | (27.6) | 88 | (34.7) | 217 | (20.8) | 258 | (20.0) | 1,193 | (24.3) | 3,503 | (25.2) |
| 61-75 | | 63 | (27.3) | 261 | (22.8) | 271 | (28.4) | 31 | (12.2) | 276 | (26.4) | 444 | (34.5) | 1,346 | (27.4) | 2,387 | (17.1) |
| +75 | | 110 | (47.6) | 290 | (25.5) | 295 | (30.9) | 6 | (2.4) | 369 | (35.3) | 527 | (40.9) | 1,597 | (32.5) | 2,709 | (19.5) |
| All | | 231 | (100.0) | 1,139 | (100.0) | 955 | (100.0) | 254 | (100.0) | 1,045 | (100.0) | 1,288 | (100.0) | 4,912 | (100.0) | 13,930 | (100.0) |
